# Supplementary material for: Effect of Mobile Health Interventions on Lifestyle and Anthropometric Characteristics of Uncontrolled Hypertensive Participants: Secondary Analyses of a Randomized Controlled Trial
Source: MDPI journal article supplement (doi:10.3390/healthcare11081069), 2023-04-08
Supplement: s1 [file s1]

**Supplemental Table S1.** Examples of text messages.

| Type (frequency)                                                               | Examples                                                                                                                                                                                                                                                                                                                                                                                                                          |
|--------------------------------------------------------------------------------|-----------------------------------------------------------------------------------------------------------------------------------------------------------------------------------------------------------------------------------------------------------------------------------------------------------------------------------------------------------------------------------------------------------------------------------|
| DASH-type diet (1/week)                                                        | <p>Hi &lt;NAME&gt;, healthy eating means at least five servings of vegetables and two servings of fruit every day.</p> <p>Hello &lt;NAME&gt;, try to choose poultry or meat trimmed of visible fat and without the skin.</p> <p>&lt;NAME&gt;, healthy eating includes ingesting 20 to 30 grams of fiber daily. For this, prefer rice, pasta, and whole-grain bread.</p>                                                           |
| Reduced sodium consumption (1/week)                                            | <p>Hello &lt;NAME&gt;, try avoiding adding salt to your foods by using spices or herbs.</p> <p>Hello &lt;NAME&gt;, reducing the consumption of processed foods contributes to lowering blood pressure.</p> <p>Hi &lt;NAME&gt;, so as not to overdo the salt consumption, avoid leaving the salt shaker on the table. The food already contains the necessary salt!</p>                                                            |
| Physical activity (1/week)                                                     | <p>Hello &lt;NAME&gt;, start practicing physical activity at low intensity and gradually increase.</p> <p>Hi &lt;NAME&gt;, make your physical activity enjoyable, invite a friend, neighbor, or spouse to exercise with you.</p> <p>Hi &lt;NAME&gt;, did you know that regular physical activity helps to reduce blood pressure, control weight, and reduce stress?</p>                                                           |
| General motivational messages for lifestyle and medications adherence (1/week) | <p>Hello &lt;NAME&gt;, if you are trying to have healthy habits and have a bad day, don't give up. Keep trying.</p> <p>&lt;NAME&gt;, did you know that staying at the right weight and eating healthy reduces your risk of having a cardiovascular problem?</p> <p>Hi &lt;NAME&gt;, your good health is important. Please try to do more exercise. Activities that make you sweat or your heart beat faster are good for you.</p> |

**Supplemental Table S2.** Consumption of each food group per week at baseline and follow-up (mean  $\pm$  SD) and between groups difference (95% CI) at 6 months.

| Food group                | Pooled mHealth group |                  | UCT group        |                  | Between groups adjusted difference*<br>(95% CI) at 6 months |
|---------------------------|----------------------|------------------|------------------|------------------|-------------------------------------------------------------|
|                           | Baseline             | 6 Months         | Baseline         | 6 Months         |                                                             |
| Low-fat dairy             | 1.29 $\pm$ 3.02      | 3.15 $\pm$ 4.30  | 1.33 $\pm$ 3.16  | 1.92 $\pm$ 4.53  | 1.22 (0.003;2.43)                                           |
| Whole grains              | 4.47 $\pm$ 7.13      | 7.92 $\pm$ 7.11  | 3.80 $\pm$ 5.41  | 6.81 $\pm$ 6.03  | 0.887 (-1.00;2.77)                                          |
| Fruits                    | 7.70 $\pm$ 6.91      | 9.41 $\pm$ 5.82  | 7.31 $\pm$ 6.32  | 9.76 $\pm$ 7.21  | -0.49 (-2.56;1.57)                                          |
| Vegetables                | 10.60 $\pm$ 6.99     | 13.10 $\pm$ 7.32 | 10.82 $\pm$ 7.08 | 10.54 $\pm$ 5.32 | 2.86 (1.17;4.55)                                            |
| Fast foods or fried foods | 1.93 $\pm$ 1.59      | 1.49 $\pm$ 1.89  | 2.04 $\pm$ 1.93  | 1.38 $\pm$ 1.46  | 0.15 (-0.40;0.70)                                           |
| Fried or fatty meats      | 4.13 $\pm$ 3.60      | 2.40 $\pm$ 2.78  | 3.44 $\pm$ 3.21  | 2.81 $\pm$ 3.25  | -0.56 (-1.55;0.43)                                          |
| Sodium-rich foods         | 8.25 $\pm$ 6.17      | 5.02 $\pm$ 4.78  | 9.07 $\pm$ 6.29  | 5.43 $\pm$ 4.37  | -0.15 (-1.51;1.22)                                          |

\* Generalized linear models, adjusted for baseline values.

**Supplemental Table S3.** Relative risk for achieving the lifestyle goals at the end of the trial by individual randomization group, adjusted for baseline values.

| Lifestyle goals                   | <i>n</i> | Baseline prevalence<br><i>n</i> (%) | 6 Months prevalence<br><i>n</i> (%) | RR (95% CI)*            | P-value      |
|-----------------------------------|----------|-------------------------------------|-------------------------------------|-------------------------|--------------|
| Loss of at least 3 kg             |          |                                     |                                     |                         |              |
| TELEMEV <sup>β</sup>              | 43       | -                                   | 9 (20.9)                            | 1.32 (0.53;3.27)        | 0.548        |
| TELEM <sup>†</sup>                | 43       | -                                   | 11 (25.6)                           | 1.66 (0.70;3.95)        | 0.253        |
| TELEM-TELEMEV <sup>£</sup>        | 88       | -                                   | 20 (22.7)                           | 1.50 (0.67;3.35)        | 0.32         |
| UCT                               | 42       | -                                   | 7 (16.7)                            | Ref.                    | -            |
| Refrain from smoking              |          |                                     |                                     |                         |              |
| TELEMEV <sup>β</sup>              | 43       | 36 (76.6)                           | 35 (81.4)                           | 0.99 (0.87;1.13)        | 0.943        |
| TELEM <sup>†</sup>                | 43       | 41 (93.2)                           | 41 (95.3)                           | 1.02 (0.93;1.24)        | 0.662        |
| TELEM-TELEMEV <sup>£</sup>        | 85       | 83 (87.4)                           | 73 (85.9)                           | 0.97 (0.89;1.06)        | 0.534        |
| UCT                               | 42       | 37 (82.2)                           | 35 (83.3)                           | Ref.                    | -            |
| Practice physical activity (1)    |          |                                     |                                     |                         |              |
| TELEMEV <sup>β</sup>              | 44       | 29 (61.7)                           | 29 (65.9)                           | 1.40 (0.96;2.05)        | 0.083        |
| TELEM <sup>†</sup>                | 43       | 32 (72.7)                           | 32 (74.4)                           | 1.51 (1.03;2.21)        | 0.035        |
| TELEM-TELEMEV <sup>£</sup>        | 86       | 55 (57.9)                           | 55 (64.0)                           | 1.43 (0.99;2.06)        | 0.055        |
| UCT                               | 42       | 23 (51.5)                           | 18 (42.9)                           | Ref.                    | -            |
| Moderate or no alcohol intake (2) |          |                                     |                                     |                         |              |
| TELEMEV <sup>β</sup>              | 44       | 39 (86.7)                           | 39 (88.6)                           | 1.08 (0.93;1.26)        | 0.291        |
| TELEM <sup>†</sup>                | 43       | 34 (79.1)                           | 39 (90.7)                           | 1.15 (0.99;1.33)        | 0.061        |
| TELEM-TELEMEV <sup>£</sup>        | 86       | 74 (83.1)                           | 80 (93.0)                           | <b>1.16 (1.01;1.33)</b> | <b>0.033</b> |
| UCT                               | 42       | 38 (90.5)                           | 35 (83.3)                           | Ref.                    | -            |
| Improve diet quality (3)          |          |                                     |                                     |                         |              |
| TELEMEV <sup>β</sup>              | 44       | 15 (34.1)                           | 25 (56.8)                           | 1.46 (0.95;2.26)        | 0.083        |
| TELEM <sup>†</sup>                | 42       | 8 (19.0)                            | 23 (54.8)                           | 1.54 (0.93;2.46)        | 0.071        |
| TELEM-TELEMEV <sup>£</sup>        | 85       | 22 (25.9)                           | 49 (57.6)                           | <b>1.56 (1.03;2.34)</b> | <b>0.033</b> |
| UCT                               | 42       | 13 (31.0)                           | 16 (38.1)                           | Ref.                    | -            |
| At least four lifestyle goals (4) |          |                                     |                                     |                         |              |
| TELEMEV <sup>β</sup>              | 42       | 7 (15.9) <sup>a</sup>               | 13 (30.9)                           | 1.86 (0.84;4.08)        | 0.124        |
| TELEM <sup>†</sup>                | 42       | 5 (11.9) <sup>a</sup>               | 22 (52.4)                           | <b>3.20 (1.54;6.65)</b> | <b>0.002</b> |
| TELEM-TELEMEV <sup>£</sup>        | 83       | 13 (15.3) <sup>a</sup>              | 35 (42.1)                           | <b>2.50 (1.23;5.10)</b> | <b>0.011</b> |
| UCT                               | 42       | 6 (14.3) <sup>a</sup>               | 7 (16.7)                            | Ref.                    | -            |

\*Data from the Generalized Poisson mixed model adjusted for baseline values.

The control group (without technology) was the reference group. (1) Physical activity  $\geq 150$  min/week; (2) Moderate or no ethanol intake: 100g (women)/200g (men) /week; (3) Following two of six dietary recommendations (Fruits and vegetables  $\geq 21$  servings/week; Whole grains  $\geq 14$  servings/week; Low-fat dairy  $\geq 7$  servings/week; Sodium-rich foods  $\leq 1$  serving/week; Fast or fried food  $< 1$  serving/week; Fried or fatty meats  $< 1$  serving/week); (4) Achieving four out of five lifestyle goals in the follow-up; <sup>a</sup> Follow 4 lifestyle (Refrain from smoking, Moderate or no alcohol intake, Improve diet quality) at baseline; RR = relative risk; <sup>β</sup> personalized text messages to stimulate lifestyle changes via a mobile application; <sup>†</sup> an automatic oscillometric device to measure and register blood pressure via a mobile application; <sup>£</sup> both mHealth interventions; UCT= usual care treatment (without technology).

**Supplemental Table S4.** Baseline and 6 months lifestyle goals and relative risk (95% CI) for reaching that goal at the end of the trial, adjusted for baseline values.

| Lifestyle goals                   | <i>n</i> | Baseline prevalence    | 6 Months prevalence | RR (95% CI)*            | P-value      |
|-----------------------------------|----------|------------------------|---------------------|-------------------------|--------------|
| Loss of at least 3 kg             |          |                        |                     |                         |              |
| Pooled mHealth                    | 174      | -                      | 40 (23.0)           | 1.08 (0.94;1.23)        | 0.250        |
| UCT                               | 42       | -                      | 7 (16.7)            | Ref.                    | -            |
| Refrain from smoking              |          |                        |                     |                         |              |
| Pooled mHealth                    | 171      | 148 (86.5)             | 149 (87.1)          | 0.99 (0.92;1.07)        | 0.840        |
| UCT                               | 42       | 34 (81.0)              | 35 (83.3)           | Ref.                    | -            |
| Practice physical activity (1)    |          |                        |                     |                         |              |
| Pooled mHealth                    | 173      | 112 (64.0)             | 116 (67.1)          | <b>1.21 (1.03;1.42)</b> | <b>0.020</b> |
| UCT                               | 42       | 21 (50.0)              | 18 (42.9)           | Ref.                    | -            |
| Moderate or no alcohol intake (2) |          |                        |                     |                         |              |
| Pooled mHealth                    | 173      | 143 (82.7)             | 158 (91.3)          | <b>1.12 (1.00;1.25)</b> | <b>0.044</b> |
| UCT                               | 42       | 38 (90.5)              | 35 (83.3)           | Ref.                    | -            |
| Improve diet quality (3)          |          |                        |                     |                         |              |
| Pooled mHealth                    | 171      | 45 (26.3)              | 97 (56.7)           | <b>1.22 (1.04;1.42)</b> | <b>0.012</b> |
| UCT                               | 42       | 13 (31.0)              | 16 (38.1)           | Ref.                    | -            |
| At least four lifestyle goals (4) |          |                        |                     |                         |              |
| Pooled mHealth                    | 167      | 25 (14.6) <sup>a</sup> | 70 (41.9)           | <b>2.51 (1.26;5.00)</b> | <b>0.009</b> |
| UCT                               | 42       | 6 (14.3) <sup>a</sup>  | 7 (16.7)            | Ref.                    | -            |

\*Data from the Generalized Poisson mixed model adjusted for baseline values. The control group (without technology) was the reference group. (1) Physical activity  $\geq 150$  min/week; (2) Moderate or no ethanol intake: 100g (women)/200g (men) /week; (3) Following two of six dietary recommendations (Fruits and vegetables  $\geq 21$  servings/week; Whole grains  $\geq 14$  servings/week; Low-fat dairy  $\geq 7$  servings/week; Sodium-rich foods  $\leq 1$  serving/week; Fast or fried food  $< 1$  serving/week; Fried or fatty meats  $< 1$  serving/week); (4) Achieving four out of five lifestyle goals in the follow-up; <sup>a</sup> Follow 4 lifestyle (Refrain from smoking, Moderate or no alcohol intake, Improve diet quality) at baseline; UCT= usual care treatment (without technology); RR = relative risk.
